# Supplementary material for: New heteroleptic bis-(diphenylphosphino)ethane appended dialkyldithiophosphate cobalt(iii) cations: apt electrocatalysts for the heterogeneous oxygen evolution reaction and homogeneous hydrogen evolution reaction
Source: Royal Society of Chemistry journal article supplement (doi:10.1039/d4nj02358g), 2024-01-01
Supplement: d4nj02358g1.pdf [file d4nj02358g1.pdf]

## ELECTRONIC SUPPORTING INFORMATION

### **New Heteroleptic bis-(diphenylphosphino)ethane appended dialkyldithiophosphatecobalt(III) cations: Apt electrocatalysts for heterogeneous OER and homogeneous HER**

Devyani Srivastava,<sup>a</sup> Omoding Daniel,<sup>a</sup> Aparna Kushwaha,<sup>a</sup> Gabriele Kociok-Köhn,<sup>b</sup> Suresh W. Gosavi,<sup>c</sup> Ratna Chauhan,<sup>d</sup> Mohd. Muddassir,<sup>e</sup> and Abhinav Kumar <sup>a\*</sup>

- 
- <sup>a.</sup> *Department of Chemistry, Faculty of Science, University of Lucknow, Lucknow 226 007, India. Email: abhinavmarshal@gmail.com*
- <sup>b.</sup> *Materials and Chemical Characterisation Facility (MC<sup>2</sup>), University of Bath, Claverton Down, Bath, BA2 7AY, UK.*
- <sup>c.</sup> *Department of Physics, Savitribai Phule Pune University, Pune-411007, India.*
- <sup>d.</sup> *Department of Environmental Science, Savitribai Phule Pune University, Pune-411007, India.*
- <sup>e.</sup> *Department of Chemistry, College of Sciences, King Saud University, Riyadh 11451, Saudi Arabia*

## ELECTRONIC SUPPORTING INFORMATION

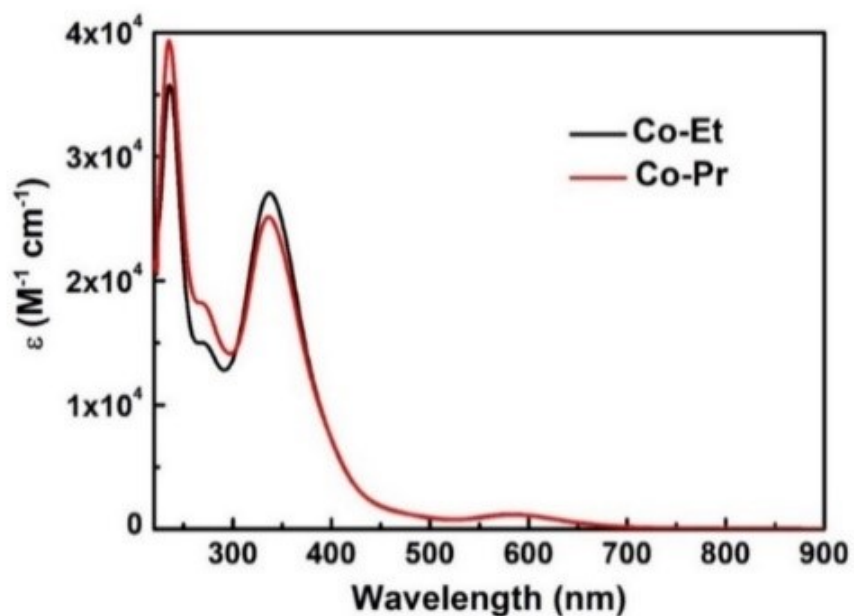

Fig. S1 Electronic absorption spectrum of **Co-Et** and **Co-Pr** in  $1 \times 10^{-4}$  M dichloromethane solution.

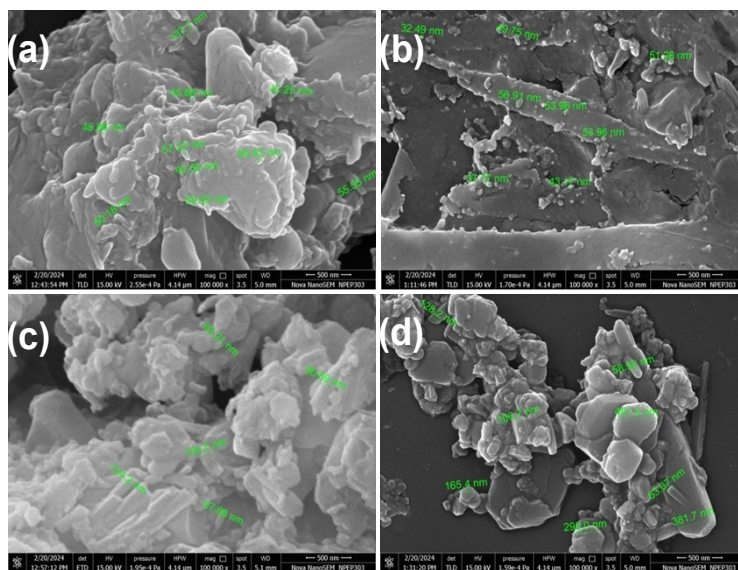

Fig. S2 FESEM images for (a) and (c) Pristine **Co-Et** and **Co-Pr**, respectively; (b) and (d) **Co-Et** and **Co-Pr** after OER electrocatalysis in 0.1 M KOH.

## ELECTRONIC SUPPORTING INFORMATION

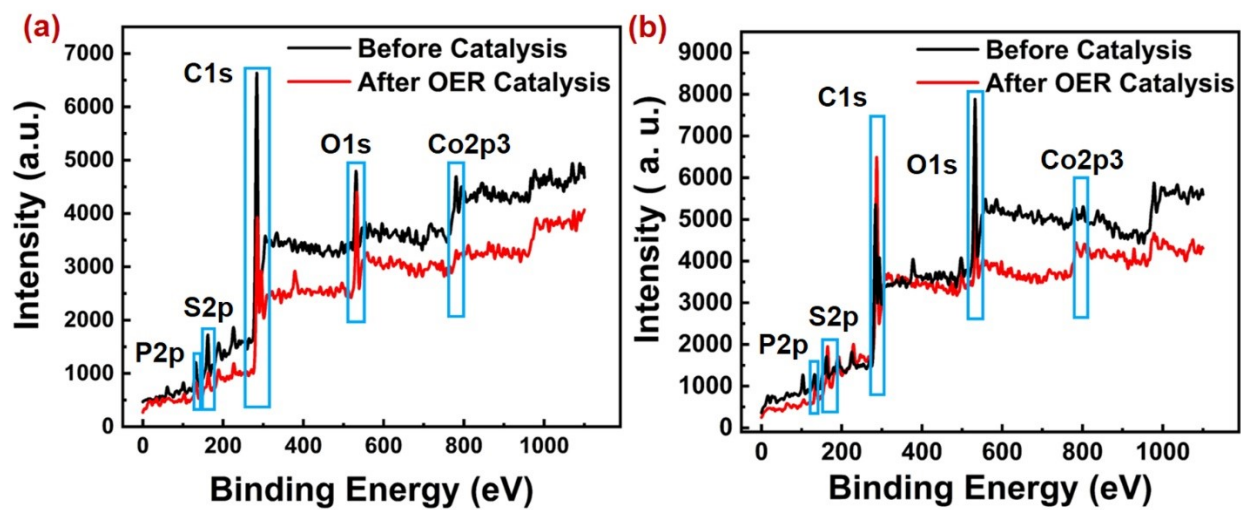

Fig. S3 XPS spectra for (a) Co-Et and (b) Co-Pr before and after OER electrocatalysis.

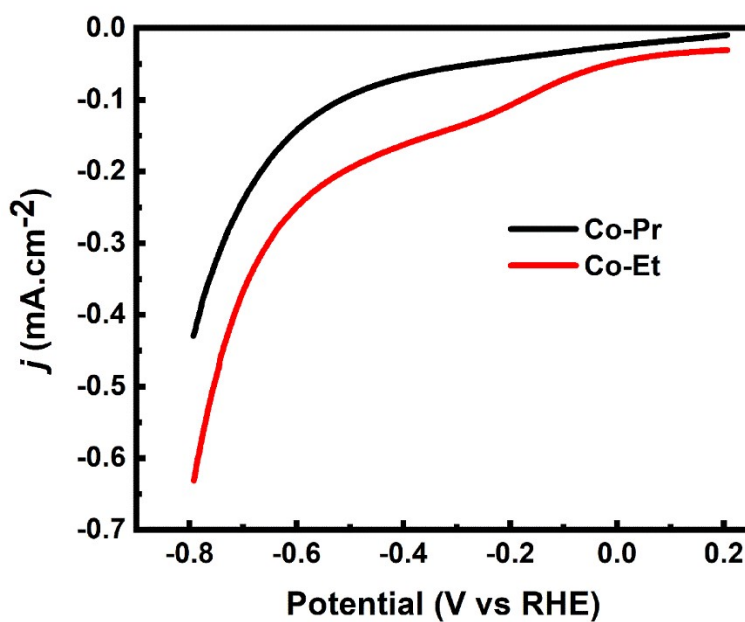

Fig. S4 Linear sweep voltammograms for Co-Et and Co-Pr in 0.5 M H<sub>2</sub>SO<sub>4</sub>.

## ELECTRONIC SUPPORTING INFORMATION

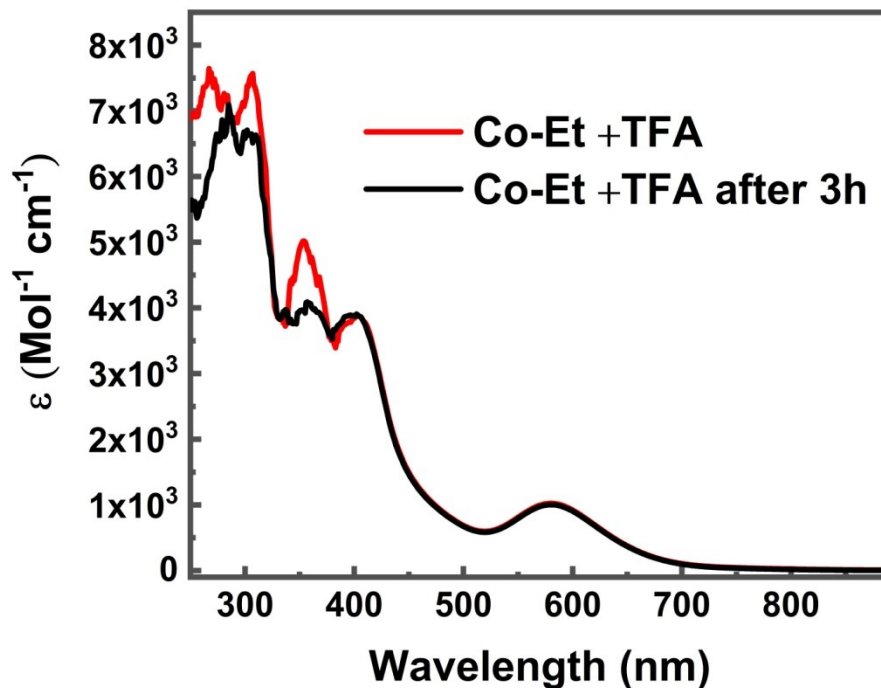

Fig. S5 The UV-Vis spectra for **Co-Et**+TFA recorded in acetonitrile at zero time and after 3 h.

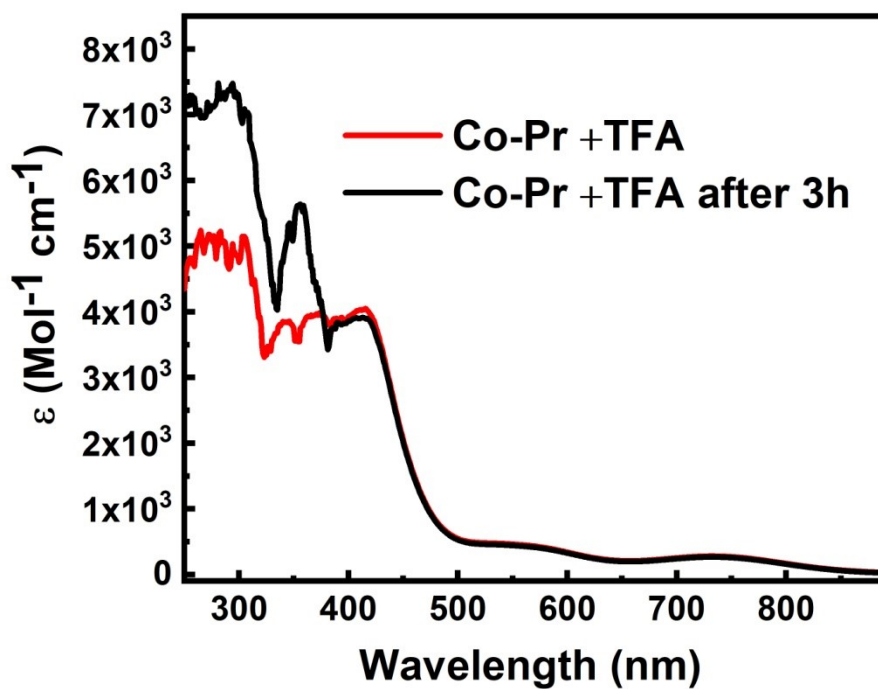

Fig. S6 The UV-Vis spectra for **Co-Pr**+TFA recorded in acetonitrile at zero time and after 3 h.

## ELECTRONIC SUPPORTING INFORMATION

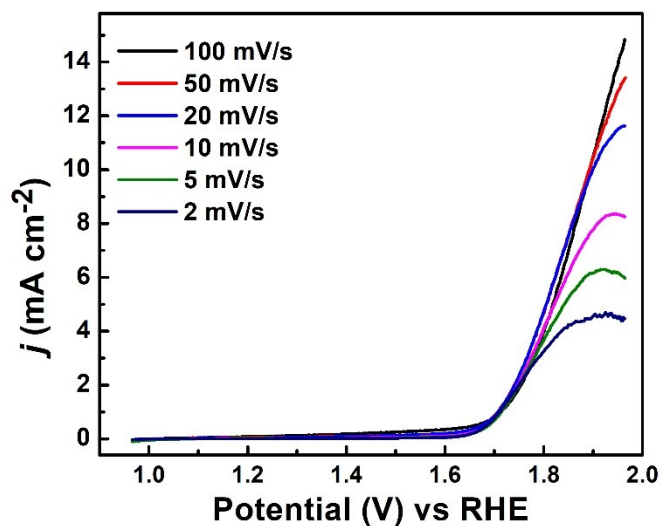

Fig. S7 Linear sweep voltammograms for **Co-Et** recorded at different scan rates in 0.1 M KOH solution.

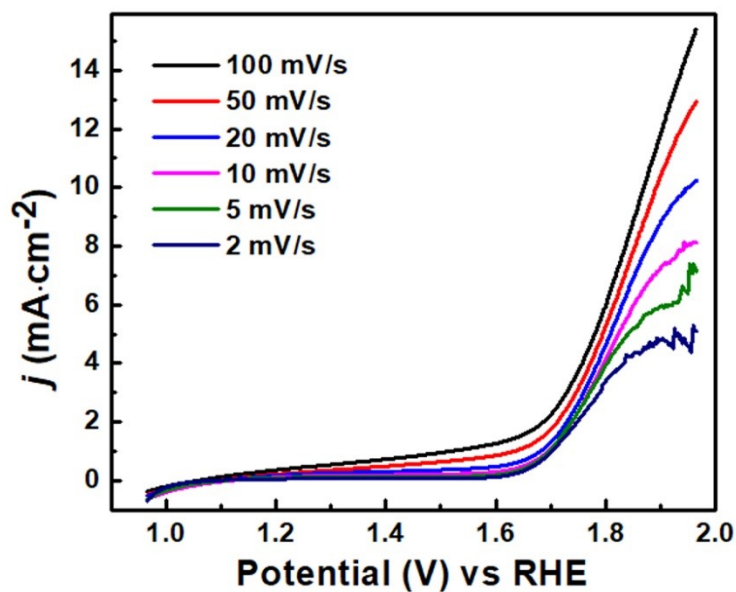

Fig. S8 Linear sweep voltammograms for **Co-Pr** recorded at different scan rates in 0.1 M KOH solution.

## ELECTRONIC SUPPORTING INFORMATION

Table S1. Comparison of electrocatalytic behavior of different Cobalt based coordination complexes towards OER.

|                                                                                                           | Current density (mA/ cm <sup>2</sup> ) | Overpotential (in V) | Tafel Slope (mV/dec) | Ref       |
|-----------------------------------------------------------------------------------------------------------|----------------------------------------|----------------------|----------------------|-----------|
| [Co(OH) <sub>2</sub> (PMBP) <sub>2</sub> ] (1)                                                            | 10                                     | 0.140                | 50                   | 1         |
| [Co(OH) <sub>2</sub> (PMTP) <sub>2</sub> ] (2)                                                            | 10                                     | 0.320                | 90                   | 1         |
| [[Co1.5(tib)(dcpna)]·6H <sub>2</sub> O]                                                                   | 10                                     | 0.360                | 89                   | 2         |
| [CoL <sub>2</sub> ] (H <sub>2</sub> L = 4-chloro-1,2-bis [2-hydroxy-5-(phenylazo)benzylideneamino]benzene | 10                                     | 0.360                | -                    | 3         |
| [CoL <sub>2</sub> ] L <sub>2</sub> :Bis[Salicyldene]-1,2-Iminophenylenediamine                            | 2                                      | 0.140                | 84                   | 3         |
| [Co(L)(CHOH) ]<br>L: Sodium (E)-4-(2-hydroxylnaphthalene-1-yl)diazinyl benzenesulfonate                   | 0.5<br>5                               | 0.520<br>0.720       | -<br>-               | 3<br>3    |
| [Co <sup>III</sup> (LN <sub>2</sub> O <sub>3</sub> )H <sub>2</sub> O]                                     | 10                                     | 0.500                | -                    | 4         |
| Co-Et                                                                                                     | 10                                     | 0.672                | 114                  | This work |
| Co-Pr                                                                                                     | 10                                     | 0.724                | 151                  | This work |

### References

1. C. S. A. Djadock, S. Vengatesan, A. C. T. Kuate, J. Ngoune, S. Ravichandran and S. Vasudevan, *Catal. Sci. Technol.*, 2023, 13, 2184-2200.
2. M. Qingguo, Y. Jianjian, M. Shixuan, Z. Mujun and L. Jitao, *Polymers*, 2017, 9, 676.
3. Z. Xiaoxin, H. Xiaoxi, G. Anandarup, S. Rafael, R. S. Bhaskar, M. Eliska, and A. Tewodros, *Angew. Chem. Int. Ed.*, 2014, 126, 4461–4465.
4. X. Zhicai, L. Qian, X. Wei, M. A. Abdullah, S. Xuping, *Chem. Sus. Chem.*, 2015, 8(11), 1850–1855.
